# Supplementary material
Source: PubMed Central journal article supplement (PMC5681478)
Supplement: NIHMS916458-supplement-Supplement.pdf [file NIHMS916458-supplement-Supplement.pdf]

| Supplementary information S1 (table) |                       |           |                             |
|--------------------------------------|-----------------------|-----------|-----------------------------|
| Gene                                 | Location              | Reference | Notes                       |
| <i>mcr1</i>                          | Shanghai              | 1         | First report of <i>mcr1</i> |
| <i>mcr1</i>                          | Pennsylvania          | 2         |                             |
| <i>mcr1</i>                          | Estonia               | 3         |                             |
| <i>mcr1</i>                          | Venezuela             | 4         |                             |
| <i>mcr1</i>                          | Brazil                | 5         |                             |
| <i>mcr1</i>                          | Ecuador               | 6         |                             |
| <i>mcr1</i>                          | Singapore             | 7         |                             |
| <i>mcr1</i>                          | Hong Kong             | 8         |                             |
| <i>mcr1</i>                          | Italy                 | 9         |                             |
| <i>mcr1</i>                          | Algeria               | 10        |                             |
| <i>mcr1</i>                          | Laos                  | 10        |                             |
| <i>mcr1</i>                          | France                | 10        |                             |
| <i>mcr1</i>                          | Thailand              | 10        |                             |
| <i>mcr1</i>                          | Nigeria               | 10        |                             |
| <i>mcr1</i>                          | Japan                 | 11        |                             |
| <i>mcr1</i>                          | Vietnam               | 12        |                             |
| <i>mcr1</i>                          | Cambodia              | 13        |                             |
| <i>mcr1</i>                          | Malaysia              | 14        |                             |
| <i>mcr1</i>                          | Denmark               | 15        |                             |
| <i>mcr1</i>                          | United Kingdom        | 16        |                             |
| <i>mcr1</i>                          | Netherlands           | 17        |                             |
| <i>mcr1</i>                          | Portugal              | 14        |                             |
| <i>mcr1</i>                          | Switzerland           | 18        |                             |
| <i>mcr1</i>                          | Germany               | 19        |                             |
| <i>mcr1</i>                          | Belgium               | 20        |                             |
| <i>mcr1</i>                          | Tamil Nadu, India     | 21        |                             |
| <i>mcr1</i>                          | New Jersey            | 22        |                             |
| <i>mcr1</i>                          | Bethesda,<br>Maryland | 23        |                             |
| <i>mcr1</i>                          | South Africa          | 24        |                             |
| <i>qnr</i>                           | Alabama               | 25        | First report of <i>qnr</i>  |
| <i>qnr</i>                           | Calgary               | 26        |                             |
| <i>qnr</i>                           | Hawaii                | 26        |                             |
| <i>qnr</i>                           | Minnesota             | 26        |                             |
| <i>qnr</i>                           | Colorado              | 26        |                             |
| <i>qnr</i>                           | Louisiana             | 26        |                             |
| <i>qnr</i>                           | Illinois              | 26        |                             |
| <i>qnr</i>                           | Maine                 | 26        |                             |

|            |                        |    |  |
|------------|------------------------|----|--|
| <i>qnr</i> | New York               | 26 |  |
| <i>qnr</i> | Georgia                | 26 |  |
| <i>qnr</i> | Liverpool              | 26 |  |
| <i>qnr</i> | Santander              | 26 |  |
| <i>qnr</i> | Paris                  | 26 |  |
| <i>qnr</i> | Berlin                 | 26 |  |
| <i>qnr</i> | Utrecht                | 26 |  |
| <i>qnr</i> | Istanbul               | 26 |  |
| <i>qnr</i> | Jerusalem              | 26 |  |
| <i>qnr</i> | Cairo                  | 26 |  |
| <i>qnr</i> | Coimbatore             | 26 |  |
| <i>qnr</i> | Bangkok                | 26 |  |
| <i>qnr</i> | Anhui province         | 26 |  |
| <i>qnr</i> | Seoul                  | 26 |  |
| <i>qnr</i> | Aichu Prefecture       | 26 |  |
| <i>qnr</i> | Shanghai               | 26 |  |
| <i>qnr</i> | Hong Kong              | 26 |  |
| <i>qnr</i> | Ho Chi Minh City       | 26 |  |
| <i>qnr</i> | Sydney                 | 26 |  |
| <i>qnr</i> | Taiwan                 | 27 |  |
| <i>qnr</i> | Croatia                | 28 |  |
| <i>qnr</i> | Kuwait                 | 29 |  |
| <i>qnr</i> | Hamadan, Iran          | 30 |  |
| <i>qnr</i> | Casablanca,<br>Morocco | 31 |  |
| <i>qnr</i> | Karaj, Iran            | 32 |  |
| <i>qnr</i> | Czech Republic         | 33 |  |
| <i>qnr</i> | Uruguay                | 34 |  |
| <i>qnr</i> | Peru                   | 35 |  |

|             |                           |    |                             |
|-------------|---------------------------|----|-----------------------------|
| <i>qnr</i>  | Brazil                    | 35 |                             |
| <i>ndm1</i> | New Delhi                 | 36 | First report of <i>ndm1</i> |
| <i>ndm1</i> | Casablanca,<br>Morocco    | 31 |                             |
| <i>ndm1</i> | St. Louis, MO             | 37 |                             |
| <i>ndm1</i> | Pakistan                  | 37 |                             |
| <i>ndm1</i> | Henan Province,<br>China  | 38 |                             |
| <i>ndm1</i> | Algeria                   | 39 |                             |
| <i>ndm1</i> | Pune, India               | 40 |                             |
| <i>ndm1</i> | Croatia                   | 41 |                             |
| <i>ndm1</i> | Los Angeles               | 42 |                             |
| <i>ndm1</i> | Afghanistan               | 43 |                             |
| <i>ndm1</i> | Washington DC             | 43 |                             |
| <i>ndm1</i> | Maryland                  | 43 |                             |
| <i>ndm1</i> | Virginia                  | 43 |                             |
| <i>ndm1</i> | Hawaii                    | 43 |                             |
| <i>ndm1</i> | Iraq                      | 43 |                             |
| <i>ndm1</i> | North Carolina            | 43 |                             |
| <i>ndm1</i> | South Africa              | 44 |                             |
| <i>ndm1</i> | Singapore                 | 45 |                             |
| <i>ndm1</i> | Nepal                     | 46 |                             |
| <i>ndm1</i> | Taiwan                    | 47 |                             |
| <i>ndm1</i> | Nigeria                   | 48 |                             |
| <i>ndm1</i> | Egypt                     | 49 |                             |
| <i>ndm1</i> | Morocco                   | 50 |                             |
| <i>ndm1</i> | Kenya                     | 51 |                             |
| <i>ndm1</i> | Paris                     | 52 |                             |
| <i>ndm1</i> | Switzerland               | 53 |                             |
| <i>ndm1</i> | Slovenia                  | 53 |                             |
| <i>ndm1</i> | Germany                   | 53 |                             |
| <i>ndm1</i> | St. Petersburg,<br>Russia | 54 |                             |
| <i>ndm1</i> | Argentina                 | 55 |                             |
| <i>ndm1</i> | Brazil                    | 56 |                             |
| <i>ndm1</i> | Paraguay                  | 57 |                             |
| <i>ndm1</i> | Colombia                  | 58 |                             |
| <i>ndm1</i> | Mexico City               | 59 |                             |
| <i>ndm1</i> | Alberta, Canada           | 60 |                             |
| <i>ndm1</i> | Colorado                  | 61 |                             |
| <i>ndm1</i> | Melbourne<br>Australia    | 62 |                             |
| <i>kpc</i>  | North Carolina            | 63 | First report of             |
| <i>kpc</i>  | St. Louis, MO             | 37 |                             |

|            |                           |    |  |
|------------|---------------------------|----|--|
| <i>kpc</i> | Pakistan                  | 37 |  |
| <i>kpc</i> | Los Angeles               | 42 |  |
| <i>kpc</i> | Taiwan                    | 47 |  |
| <i>kpc</i> | St. Petersburg,<br>Russia | 54 |  |
| <i>kpc</i> | Alberta, Canada           | 60 |  |
| <i>kpc</i> | Colorado                  | 61 |  |
| <i>kpc</i> | Korea                     | 64 |  |
| <i>kpc</i> | Portugal                  | 65 |  |
| <i>kpc</i> | Venezuela                 | 66 |  |
| <i>kpc</i> | Tunisia                   | 67 |  |
| <i>kpc</i> | New York City             | 68 |  |
| <i>kpc</i> | Greece                    | 69 |  |
| <i>kpc</i> | Italy                     | 69 |  |
| <i>kpc</i> | Belgium                   | 70 |  |
| <i>kpc</i> | Iran                      | 71 |  |
| <i>kpc</i> | China                     | 72 |  |
| <i>kpc</i> | Chicago                   | 73 |  |
| <i>kpc</i> | Ethiopia                  | 74 |  |
| <i>kpc</i> | Brazil                    | 75 |  |
| <i>kpc</i> | Spain                     | 76 |  |
| <i>kpc</i> | Puerto Rico               | 77 |  |
| <i>kpc</i> | Netherlands               | 78 |  |
| <i>kpc</i> | Houston, Texas            | 79 |  |
| <i>kpc</i> | Perth, Australia          | 80 |  |
| <i>kpc</i> | Cleveland, Ohio           | 81 |  |

## References

- 1 Liu, Y. Y. *et al.* Emergence of plasmid-mediated colistin resistance mechanism *MCR1* in animals and human beings in China: a microbiological and molecular biological study. *Lancet Infect Dis* **16**, 161-168, doi:10.1016/s1473-3099(15)00424-7 (2016).
- 2 Kline, K. E. *et al.* Investigation of First Identified *mcr1* Gene in an Isolate from a U.S. Patient - Pennsylvania, 2016. *MMWR Morb Mortal Wkly Rep* **65**, 977-978, doi:10.15585/mmwr.mm6536e2 (2016).
- 3 Brauer, A. *et al.* Plasmid with colistin resistance gene *mcr1* in ESBL-producing *Escherichia coli* strains isolated from pig slurry in Estonia. *Antimicrob Agents Chemother*, doi:10.1128/aac.00443-16 (2016).
- 4 Delgado-Blas, J. F., Ovejero, C. M., Abadia-Patino, L. & Gonzalez-Zorn, B. Coexistence of *mcr1* and *bla<sub>NDM1</sub>* in *Escherichia coli* from Venezuela. *Antimicrob Agents Chemother* **60**, 6356-6358, doi:10.1128/aac.01319-16 (2016).
- 5 Fernandes, M. R. *et al.* First Report of the Globally Disseminated IncX4 Plasmid Carrying the *mcr1* Gene in a Colistin-Resistant *Escherichia coli* Sequence Type 101 Isolate from a Human Infection in Brazil. *Antimicrob Agents Chemother* **60**, 6415-6417, doi:10.1128/aac.01325-16 (2016).
- 6 Ortega-Paredes, D., Barba, P. & Zurita, J. Colistin-resistant *Escherichia coli* clinical isolate harbouring the *mcr1* gene in Ecuador. *Epidemiol Infect* **144**, 2967-2970, doi:10.1017/s0950268816001369 (2016).
- 7 Teo, J. Q. *et al.* *mcr1* in Multidrug-Resistant *bla<sub>KPC-2</sub>*-Producing Clinical Enterobacteriaceae Isolates in Singapore. *Antimicrob Agents Chemother* **60**, 6435-6437, doi:10.1128/aac.00804-16 (2016).
- 8 Wong, S. C. *et al.* Colistin-Resistant Enterobacteriaceae Carrying the *mcr1* Gene among Patients in Hong Kong. *Emerg Infect Dis* **22**, 1667-1669, doi:10.3201/eid2209.160091 (2016).
- 9 Carnevali, C. *et al.* Occurrence of *MCR1* colistin-resistant *Salmonella* isolates recovered from human and animals in Italy, 2012-2015. *Antimicrob Agents Chemother*, doi:10.1128/aac.01803-16 (2016).
- 10 Olaitan, A. O., Chabou, S., Okdah, L., Morand, S. & Rolain, J. M. Dissemination of the *mcr1* colistin resistance gene. *Lancet Infect Dis* **16**, 147, doi:10.1016/s1473-3099(15)00540-x (2016).
- 11 Suzuki, S., Ohnishi, M., Kawanishi, M., Akiba, M. & Kuroda, M. Investigation of a plasmid genome database for colistin-resistance gene *mcr1*. *Lancet Infect Dis* **16**, 284-285, doi:10.1016/s1473-3099(16)00008-6 (2016).
- 12 Malhotra-Kumar, S. *et al.* Colistin-resistant *Escherichia coli* harbouring *mcr1* isolated from food animals in Hanoi, Vietnam. *Lancet Infect Dis* **16**, 286-287, doi:10.1016/s1473-3099(16)00014-1 (2016).
- 13 Stoesser, N., Mathers, A. J., Moore, C. E., Day, N. P. & Crook, D. W. Colistin resistance gene *mcr1* and pHNSHP45 plasmid in human isolates of *Escherichia coli* and *Klebsiella pneumoniae*. *Lancet Infect Dis* **16**, 285-286, doi:10.1016/s1473-3099(16)00010-4 (2016).
- 14 Hu, Y., Liu, F., Lin, I. Y., Gao, G. F. & Zhu, B. Dissemination of the *mcr1* colistin resistance gene. *Lancet Infect Dis* **16**, 146-147, doi:10.1016/s1473-3099(15)00533-2 (2016).
- 15 Hasman, H. *et al.* Detection of *mcr1* encoding plasmid-mediated colistin-resistant *Escherichia coli* isolates from human bloodstream infection and imported chicken meat, Denmark 2015. *Euro Surveill* **20**, doi:10.2807/1560-7917.es.2015.20.49.30085 (2015).

- 16 Webb, H. E. *et al.* Dissemination of the *mcr1* colistin resistance gene. *Lancet Infect Dis* **16**, 144-145, doi:10.1016/s1473-3099(15)00538-1 (2016).
- 17 Arcilla, M. S. *et al.* Dissemination of the *mcr1* colistin resistance gene. *Lancet Infect Dis* **16**, 147-149, doi:10.1016/s1473-3099(15)00541-1 (2016).
- 18 Haenni, M. *et al.* Co-occurrence of extended spectrum beta lactamase and *MCR1* encoding genes on plasmids. *Lancet Infect Dis* **16**, 281-282, doi:10.1016/s1473-3099(16)00007-4 (2016).
- 19 Falgenhauer, L. *et al.* Colistin resistance gene *mcr1* in extended-spectrum beta-lactamase-producing and carbapenemase-producing Gram-negative bacteria in Germany. *Lancet Infect Dis* **16**, 282-283, doi:10.1016/s1473-3099(16)00009-8 (2016).
- 20 Malhotra-Kumar, S. *et al.* Colistin resistance gene *mcr1* harboured on a multidrug resistant plasmid. *Lancet Infect Dis* **16**, 283-284, doi:10.1016/s1473-3099(16)00012-8 (2016).
- 21 Veeraraghavan, B. *et al.* Draft Genome Sequence of Colistin-Resistant *Acinetobacter baumannii* Strain VB22595 Isolated from a Central Line-Associated Bloodstream Infection. *Genome Announc* **4**, doi:10.1128/genomeA.00835-16 (2016).
- 22 Mediavilla, J. R. *et al.* Colistin- and Carbapenem-Resistant *Escherichia coli* Harboring *mcr1* and blaNDM-5, Causing a Complicated Urinary Tract Infection in a Patient from the United States. *MBio* **7**, doi:10.1128/mBio.01191-16 (2016).
- 23 McGann, P. *et al.* *Escherichia coli* Harboring *mcr1* and blaCTX-M on a Novel IncF Plasmid: First Report of *mcr1* in the United States. *Antimicrob Agents Chemother* **60**, 4420-4421, doi:10.1128/aac.01103-16 (2016).
- 24 Coetzee, J. *et al.* Emergence of plasmid-mediated colistin resistance (*MCR1*) among *Escherichia coli* isolated from South African patients. *S Afr Med J* **106**, 35-36, doi:10.7196/SAMJ.2016.v106i5.10710 (2016).
- 25 Martinez-Martinez, L., Pascual, A. & Jacoby, G. A. Quinolone resistance from a transferable plasmid. *Lancet* **351**, 797-799, doi:10.1016/s0140-6736(97)07322-4 (1998).
- 26 Robicsek, A., Jacoby, G. A. & Hooper, D. C. The worldwide emergence of plasmid-mediated quinolone resistance. *Lancet Infect Dis* **6**, 629-640, doi:10.1016/s1473-3099(06)70599-0 (2006).
- 27 Kao, C. Y. *et al.* Plasmid-mediated quinolone resistance determinants in quinolone-resistant *Escherichia coli* isolated from patients with bacteremia in a university hospital in Taiwan, 2001-2015. *Sci Rep* **6**, 32281, doi:10.1038/srep32281 (2016).
- 28 Bedenic, B. *et al.* Emergence of multidrug-resistant *Proteus mirabilis* in a long-term care facility in Croatia. *Wien Klin Wochenschr* **128**, 404-413, doi:10.1007/s00508-016-1005-x (2016).
- 29 Vali, L., Dashti, A. A., Jadaon, M. M. & El-Shazly, S. The emergence of plasmid mediated quinolone resistance *qnrA2* in extended spectrum beta-lactamase producing *Klebsiella pneumoniae* in the Middle East. *Daru* **23**, 34, doi:10.1186/s40199-015-0116-7 (2015).
- 30 Sedighi, I., Arabestani, M. R., Rahimbakhsh, A., Karimitabar, Z. & Alikhani, M. Y. Dissemination of Extended-Spectrum beta-Lactamases and Quinolone Resistance Genes Among Clinical Isolates of Uropathogenic *Escherichia coli* in Children. *Jundishapur J Microbiol* **8**, e19184, doi:10.5812/jjm.19184v2 (2015).
- 31 Barguigua, A. *et al.* Occurrence of OXA-48 and *ndm1* carbapenemase-producing *Klebsiella pneumoniae* in a Moroccan university hospital in Casablanca, Morocco. *Infect Genet Evol* **31**, 142-148, doi:10.1016/j.meegid.2015.01.010 (2015).

- 32 Seyedpour, S. M. & Eftekhari, F. Quinolone Susceptibility and Detection of qnr and aac(6')-Ib-cr Genes in Community Isolates of *Klebsiella pneumoniae*. *Jundishapur J Microbiol* **7**, e11136, doi:10.5812/jjm.11136 (2014).
- 33 Dolejska, M. *et al.* Dissemination of IncFII(K)-type plasmids in multiresistant CTX-M-15-producing Enterobacteriaceae isolates from children in hospital paediatric oncology wards. *Int J Antimicrob Agents* **40**, 510-515, doi:10.1016/j.ijantimicag.2012.07.016 (2012).
- 34 Bado, I. *et al.* Detection of class 1 and 2 integrons, extended-spectrum beta-lactamases and qnr alleles in enterobacterial isolates from the digestive tract of Intensive Care Unit inpatients. *Int J Antimicrob Agents* **36**, 453-458, doi:10.1016/j.ijantimicag.2010.06.042 (2010).
- 35 Bonelli, R. R., Moreira, B. M. & Picao, R. C. Antimicrobial resistance among Enterobacteriaceae in South America: history, current dissemination status and associated socioeconomic factors. *Drug Resist Updat* **17**, 24-36, doi:10.1016/j.drug.2014.02.001 (2014).
- 36 Castanheira, M. *et al.* Early dissemination of *ndm1*- and OXA-181-producing Enterobacteriaceae in Indian hospitals: report from the SENTRY Antimicrobial Surveillance Program, 2006-2007. *Antimicrob Agents Chemother* **55**, 1274-1278, doi:10.1128/aac.01497-10 (2011).
- 37 Pesesky, M. W. *et al.* *kpc* and *ndm1* genes in related Enterobacteriaceae strains and plasmids from Pakistan and the United States. *Emerg Infect Dis* **21**, 1034-1037, doi:10.3201/eid2106.141504 (2015).
- 38 Qin, S. *et al.* High incidence and endemic spread of *ndm1*-positive Enterobacteriaceae in Henan Province, China. *Antimicrob Agents Chemother* **58**, 4275-4282, doi:10.1128/aac.02813-13 (2014).
- 39 Ramoul, A. *et al.* Co-occurrence of *bla**ndm1* with *bla*OXA-23 or *bla*OXA-58 in clinical multidrug-resistant *Acinetobacter baumannii* isolates in Algeria. *J Glob Antimicrob Resist* **6**, 136-141, doi:10.1016/j.jgar.2016.05.003 (2016).
- 40 Ranjan, A. *et al.* Molecular epidemiology and genome dynamics of New Delhi metallo-beta-lactamase (NDM) producing extraintestinal pathogenic *E. coli* (ExPEC) strains from India. *Antimicrob Agents Chemother*, doi:10.1128/aac.01345-16 (2016).
- 41 Bedenic, B. *et al.* Molecular characterization of class b carbapenemases in advanced stage of dissemination and emergence of class d carbapenemases in Enterobacteriaceae from Croatia. *Infect Genet Evol* **43**, 74-82, doi:10.1016/j.meegid.2016.05.011 (2016).
- 42 Pannaraj, P. S., Bard, J. D., Cerini, C. & Weissman, S. J. Pediatric carbapenem-resistant Enterobacteriaceae in Los Angeles, California, a high-prevalence region in the United States. *Pediatr Infect Dis J* **34**, 11-16, doi:10.1097/inf.0000000000000471 (2015).
- 43 McGann, P. *et al.* Complete sequence of a novel 178-kilobase plasmid carrying *bla*(*ndm1*) in a *Providencia stuartii* strain isolated in Afghanistan. *Antimicrob Agents Chemother* **56**, 1673-1679, doi:10.1128/aac.05604-11 (2012).
- 44 Lowman, W. *et al.* *ndm1* has arrived: first report of a carbapenem resistance mechanism in South Africa. *S Afr Med J* **101**, 873-875 (2011).
- 45 Chen, Y. T., Lin, A. C., Siu, L. K. & Koh, T. H. Sequence of closely related plasmids encoding *bla*(*ndm1*) in two unrelated *Klebsiella pneumoniae* isolates in Singapore. *PLoS ONE* **7**, e48737, doi:10.1371/journal.pone.0048737 (2012).
- 46 Tada, T. *et al.* Dissemination of multidrug-resistant *Klebsiella pneumoniae* clinical isolates with various combinations of carbapenemases (*ndm1* and OXA-72) and 16S rRNA methylases (ArmA, RmtC and RmtF) in Nepal. *Int J Antimicrob Agents* **42**, 372-374, doi:10.1016/j.ijantimicag.2013.06.014 (2013).

- 47 Chiu, S. K. *et al.* National surveillance study on carbapenem non-susceptible *Klebsiella pneumoniae* in Taiwan: the emergence and rapid dissemination of *kpc-2* carbapenemase. *PLoS ONE* **8**, e69428, doi:10.1371/journal.pone.0069428 (2013).
- 48 Walkty, A. *et al.* Isolation of multiple carbapenemase-producing Gram-negative bacilli from a patient recently hospitalized in Nigeria. *Diagn Microbiol Infect Dis* **81**, 296-298, doi:10.1016/j.diagmicrobio.2015.01.005 (2015).
- 49 El-Sayed-Ahmed, M. A. *et al.* High prevalence of *bla(ndm1)* carbapenemase-encoding gene and 16S rRNA *armA* methyltransferase gene among *Acinetobacter baumannii* clinical Isolates in Egypt. *Antimicrob Agents Chemother* **59**, 3602-3605, doi:10.1128/aac.04412-14 (2015).
- 50 Barguigua, A. *et al.* First report of a *Klebsiella pneumoniae* strain coproducing *ndm1*, VIM-1 and OXA-48 carbapenemases isolated in Morocco. *Apmis* **121**, 675-677, doi:10.1111/apm.12034 (2013).
- 51 Revathi, G., Siu, L. K., Lu, P. L. & Huang, L. Y. First report of *ndm1*-producing *Acinetobacter baumannii* in East Africa. *Int J Infect Dis* **17**, e1255-1258, doi:10.1016/j.ijid.2013.07.016 (2013).
- 52 Bonnin, R. A., Cuzon, G., Poirel, L. & Nordmann, P. Multidrug-resistant *Acinetobacter baumannii* clone, France. *Emerg Infect Dis* **19**, 822-823, doi:10.3201/eid1905.121618 (2013).
- 53 Bonnin, R. A. *et al.* Dissemination of New Delhi metallo-beta-lactamase-1-producing *Acinetobacter baumannii* in Europe. *Clin Microbiol Infect* **18**, E362-365, doi:10.1111/j.1469-0691.2012.03928.x (2012).
- 54 Ageevets, V. A. *et al.* Emergence of carbapenemase-producing Gram-negative bacteria in Saint Petersburg, Russia. *Int J Antimicrob Agents* **44**, 152-155, doi:10.1016/j.ijantimicag.2014.05.004 (2014).
- 55 Brovedan, M. *et al.* Complete Sequence of a *bla(ndm1)*-Harboring Plasmid in an *Acinetobacter bereziniae* Clinical Strain Isolated in Argentina. *Antimicrob Agents Chemother* **59**, 6667-6669, doi:10.1128/aac.00367-15 (2015).
- 56 Andrade, L. N. & Darini, A. L. Response to detection of New Delhi metallo-beta-lactamase-producing bacteria, Brazil. *Emerg Infect Dis* **21**, 1069-1071, doi:10.3201/eid2106.140113 (2015).
- 57 Pasteran, F. *et al.* Emergence of genetically unrelated *ndm1*-producing *Acinetobacter pittii* strains in Paraguay. *J Antimicrob Chemother* **69**, 2575-2578, doi:10.1093/jac/dku139 (2014).
- 58 Escobar Perez, J. A. *et al.* Outbreak of *ndm1*-producing *Klebsiella pneumoniae* in a neonatal unit in Colombia. *Antimicrob Agents Chemother* **57**, 1957-1960, doi:10.1128/aac.01447-12 (2013).
- 59 Torres-Gonzalez, P. *et al.* Outbreak caused by Enterobacteriaceae harboring *ndm1* metallo-beta-lactamase carried in an IncFII plasmid in a tertiary care hospital in Mexico City. *Antimicrob Agents Chemother* **59**, 7080-7083, doi:10.1128/aac.00055-15 (2015).
- 60 Peirano, G., Ahmed-Bentley, J., Fuller, J., Rubin, J. E. & Pitout, J. D. Travel-related carbapenemase-producing Gram-negative bacteria in Alberta, Canada: the first 3 years. *J Clin Microbiol* **52**, 1575-1581, doi:10.1128/jcm.00162-14 (2014).
- 61 Epon, E. E. *et al.* Carbapenem-resistant *Klebsiella pneumoniae* producing New Delhi metallo-beta-lactamase at an acute care hospital, Colorado, 2012. *Infect Control Hosp Epidemiol* **35**, 390-397, doi:10.1086/675607 (2014).
- 62 Shoma, S., Kamruzzaman, M., Ginn, A. N., Iredell, J. R. & Partridge, S. R. Characterization of multidrug-resistant *Klebsiella pneumoniae* from Australia carrying *blandm1*. *Diagn Microbiol Infect Dis* **78**, 93-97, doi:10.1016/j.diagmicrobio.2013.08.001 (2014).



- 63 Yigit, H. *et al.* Novel carbapenem-hydrolyzing beta-lactamase, *kpc-1*, from a carbapenem-resistant strain of *Klebsiella pneumoniae*. *Antimicrob Agents Chemother* **45**, 1151-1161, doi:10.1128/aac.45.4.1151-1161.2001 (2001).
- 64 Jeong, S. H. *et al.* Prevalence and Molecular Characteristics of Carbapenemase-Producing Enterobacteriaceae From Five Hospitals in Korea. *Ann Lab Med* **36**, 529-535, doi:10.3343/alm.2016.36.6.529 (2016).
- 65 Vubil, D. *et al.* Outbreak of *kpc-3*-producing ST15 and ST348 *Klebsiella pneumoniae* in a Portuguese hospital. *Epidemiol Infect*, 1-5, doi:10.1017/s0950268816002442 (2016).
- 66 Falco, A., Ramos, Y., Franco, E., Guzman, A. & Takiff, H. A cluster of *kpc-2* and VIM-2-producing *Klebsiella pneumoniae* ST833 isolates from the pediatric service of a Venezuelan Hospital. *BMC Infect Dis* **16**, 595, doi:10.1186/s12879-016-1927-y (2016).
- 67 Ben Tanfous, F. *et al.* First Description of *kpc-2*-Producing *Escherichia coli* and ST15 OXA-48-Positive *Klebsiella pneumoniae* in Tunisia. *Microb Drug Resist*, doi:10.1089/mdr.2016.0090 (2016).
- 68 Abdallah, M. *et al.* Rise and fall of *kpc*-producing *Klebsiella pneumoniae* in New York City. *J Antimicrob Chemother* **71**, 2945-2948, doi:10.1093/jac/dkw242 (2016).
- 69 Papagiannitsis, C. C. *et al.* Characterization of *kpc*-encoding plasmids from two endemic settings, Greece and Italy. *J Antimicrob Chemother* **71**, 2824-2830, doi:10.1093/jac/dkw227 (2016).
- 70 De Laveleye, M. *et al.* Increasing incidence of carbapenemase-producing *Escherichia coli* and *Klebsiella pneumoniae* in Belgian hospitals. *Eur J Clin Microbiol Infect Dis*, doi:10.1007/s10096-016-2782-x (2016).
- 71 Sadeghi, M., Ghotaslou, R., Akhi, M. T., Hasani, A. & Asgharzadeh, M. Molecular Characterization of Extended-Spectrum-beta-Lactamase, Plasmid-Mediated AmpC cephalosporinase, and Carbapenemase Genes among Enterobacteriaceae Isolates in Five Medical Centers of East and West Azerbaijan, Iran. *J Med Microbiol*, doi:10.1099/jmm.0.000356 (2016).
- 72 Lin, X. *et al.* Emergence of *Serratia marcescens* isolates possessing carbapenem-hydrolysing beta-lactamase *kpc-2* from China. *J Hosp Infect* **94**, 65-67, doi:10.1016/j.jhin.2016.04.006 (2016).
- 73 Haverkate, M. R. *et al.* Duration of Colonization With *Klebsiella pneumoniae* Carbapenemase-Producing Bacteria at Long-Term Acute Care Hospitals in Chicago, Illinois. *Open Forum Infect Dis* **3**, ofw178, doi:10.1093/ofid/ofw178 (2016).
- 74 Desta, K. *et al.* High Gastrointestinal Colonization Rate with Extended-Spectrum beta-Lactamase-Producing Enterobacteriaceae in Hospitalized Patients: Emergence of Carbapenemase-Producing *K. pneumoniae* in Ethiopia. *PLoS ONE* **11**, e0161685, doi:10.1371/journal.pone.0161685 (2016).
- 75 Rossi Goncalves, I. *et al.* Outbreaks of colistin-resistant and colistin-susceptible *kpc*-producing *Klebsiella pneumoniae* in a Brazilian intensive care unit. *J Hosp Infect*, doi:10.1016/j.jhin.2016.08.019 (2016).
- 76 Oteo, J. *et al.* The spread of *kpc*-producing Enterobacteriaceae in Spain: WGS analysis of the emerging high-risk clones of *Klebsiella pneumoniae* ST11/*kpc-2*, ST101/*kpc-2* and ST512/*kpc-3*. *J Antimicrob Chemother*, doi:10.1093/jac/dkw321 (2016).
- 77 Martinez, T., Martinez, I., Vazquez, G. J., Aquino, E. E. & Robledo, I. E. Genetic environment of the *kpc* gene in *Acinetobacter baumannii* ST2 clone from Puerto Rico and genomic insights into its drug resistance. *J Med Microbiol* **65**, 784-792, doi:10.1099/jmm.0.000289 (2016).

- 78 Vlek, A. L. *et al.* Detection and epidemiology of carbapenemase producing Enterobacteriaceae in the Netherlands in 2013-2014. *Eur J Clin Microbiol Infect Dis* **35**, 1089-1096, doi:10.1007/s10096-016-2636-6 (2016).
- 79 Castanheira, M. *et al.* Rapid expansion of *kpc-2*-producing *Klebsiella pneumoniae* isolates in two Texas hospitals due to clonal spread of ST258 and ST307 lineages. *Microb Drug Resist* **19**, 295-297, doi:10.1089/mdr.2012.0238 (2013).
- 80 Partridge, S. R. *et al.* Emergence of *bla<sub>kpc</sub>* carbapenemase genes in Australia. *Int J Antimicrob Agents* **45**, 130-136, doi:10.1016/j.ijantimicag.2014.10.006 (2015).
- 81 Endimiani, A. *et al.* Presence of plasmid-mediated quinolone resistance in *Klebsiella pneumoniae* isolates possessing *bla<sub>kpc</sub>* in the United States. *Antimicrob Agents Chemother* **52**, 2680-2682, doi:10.1128/aac.00158-08 (2008).
